# Supplementary material for: Reactions of P/S-containing proligands with coinage metal salts: a new route to polynuclear complexes with unusual structural types
Source: Royal Society of Chemistry journal article supplement (doi:10.1039/b512473e), 2005-01-01
Supplement: b512473e.pdf [file b512473e.pdf]

## **Supplementary Information**

# **Reactions of P/S-containing proligands with coinage metal salts: a new route to polynuclear complexes with unusual structural types**

### **Experimental**

#### compound 1

A mixture of Lawesson's reagent 202 mg (0.50 mmol) and AgOAc 334 mg (2.00 mmol) was dissolved in 10 mL THF. The mixture was stirred for about 3 hours at room temperature, during which time the formation of a grey-yellow precipitate was observed. The mixture was filtered and the residue was dissolved by addition of a solution of dppm (0.26 M in thf, 7.2 mL). Solvent diffusion within a double-Schlenk tube of Et<sub>2</sub>O (0 °C) into the reaction mixture (RT) produced orange crystals of **1** after 7 days. 0.58 g, yield 51%. mp 149 °C (decomposed, black solid); Found: C, 56.87; H, 4.63. C<sub>114</sub>H<sub>102</sub>Ag<sub>4</sub>O<sub>4</sub>P<sub>10</sub>S<sub>4</sub> requires C, 56.92; H, 4.27 %;  $\nu_{\max}/\text{cm}^{-1}$  (KBr) 3051s, 2859s (CH<sub>3</sub>O), 1592s, 1431s (P-C), 1241s, 1090s and 692s (P=S);  $\delta_{\text{H}}$  (400 MHz; CDCl<sub>3</sub>; 25 °C) 1.25 (14H, t, *J* 7.2, 4.7 × OCH<sub>2</sub>CH<sub>3</sub>), 1.90 (14H, m, 3.5 × OCH<sub>2</sub>CH<sub>2</sub>), 3.52 (17H, t and br, s, *J* 7.2, 4.7 × OCH<sub>2</sub>CH<sub>3</sub> and 4 × P-CH<sub>2</sub>-P), 3.77-3.80 (14H, m, 3.5 × OCH<sub>2</sub>CH<sub>2</sub>), 6.90-7.05 (84H, m, ArH), 8.54 (4H, m, ArH);  $\delta_{\text{P}}$  (162 MHz; CDCl<sub>3</sub>; 25 °C; 65% H<sub>3</sub>PO<sub>4</sub>) 66.7, -6.5 (br, s, dppm).

#### compound 2

A mixture of Lawesson's reagent 202 mg (0.50 mmol) and AgOAc 334 mg (2.00 mmol) was dissolved in 10 mL THF. The mixture was stirred for about 3 hours at room temperature, during which time the formation of a grey-yellow precipitate was observed. The mixture was filtered and the residue was dissolved by addition of a solution of PPh<sub>3</sub> (0.4 M in thf, 6 mL). Solvent diffusion within a double-Schlenk tube of Et<sub>2</sub>O (0 °C) into the reaction mixture (RT) produced orange crystals of **2** after 7 days. 0.33g, yield 52%. mp 140 °C (decomposed, black solid); Found: C, 40.18; H, 2.95. C<sub>300</sub>H<sub>264</sub>Ag<sub>28</sub>O<sub>24</sub>P<sub>24</sub>S<sub>26</sub> requires C, 40.71; H, 3.01 %;  $\nu_{\max}/\text{cm}^{-1}$  (KBr) 3043m, 2830w (CH<sub>3</sub>O), 1592s, 1433s (P-C), 1245s, 1093s and 691s (P=S);  $\delta_{\text{H}}$  (400 MHz; CDCl<sub>3</sub>; 25 °C) 1.25 (15H, t, *J* 7.2, 5 × OCH<sub>2</sub>CH<sub>3</sub>), 1.90 (20H, m, 5 × OCH<sub>2</sub>CH<sub>2</sub>), 3.52 (12H, t, *J* 7.2, 5 × OCH<sub>2</sub>CH<sub>3</sub>), 3.67-3.85 (56H, m, 5 × OCH<sub>2</sub>CH<sub>2</sub> and 12 × OCH<sub>3</sub>), 6.79-6.92 (24H, m, ArH), 7.26 (180H, br, PPh<sub>3</sub>) and 7.80-7.93 (24H, m, ArH);  $\delta_{\text{P}}$  (162 MHz; CDCl<sub>3</sub>; 25 °C; 65% H<sub>3</sub>PO<sub>4</sub>) 72.1, 68.7, 2.4 (br, s, PPh<sub>3</sub>).

Byproducts like Ac<sub>2</sub>O or [ArPOS]<sub>3</sub> were found and characterised in similar reactions (see ref. 11 and 12 for details).

#### compound 3

A mixture of P<sub>2</sub>S<sub>5</sub> 111 mg (0.50 mmol), Cu'OBu 137 mg (1.00 mmol) and PPh<sub>3</sub> 524 mg (2.00 mmol) was dissolved in 10 mL Toluene. The resulting yellow solution was heated to 40~50°C for about 3 hours. Storage of the yellow solution at 0°C for 4 weeks produced colorless crystals of **3**. 0.05 g, yield 17%. mp 134 °C (decomposed, brown solid); Found: C, 58.01; H, 4.65. C<sub>80</sub>H<sub>78</sub>Cu<sub>3</sub>O<sub>4</sub>P<sub>7</sub>S<sub>6</sub>(+C<sub>7</sub>H<sub>8</sub>O) requires C, 57.68; H, 4.79 %;  $\nu_{\max}/\text{cm}^{-1}$  (KBr) 3047m, 2970w, 1584w, 1433s (P-C), 1093s, 868s (P-O-P) and 689s (P=S);  $\delta_{\text{H}}$  (400 MHz; d<sub>8</sub>-Toluene; 25 °C) 1.60 (18H, s, 2 × OC(CH<sub>3</sub>)<sub>3</sub>), 6.96-7.46 (60H, m, ArH);  $\delta_{\text{P}}$  (162 MHz; CDCl<sub>3</sub>; 25 °C; 65% H<sub>3</sub>PO<sub>4</sub>) 59.9, 42.6, -2.9 (br, s, PPh<sub>3</sub>).
